# Supplementary material for: The role of energy cost on accuracy, sensitivity, specificity, speed and adaptation of T cell foreign and self recognition
Source: Royal Society of Chemistry journal article supplement (doi:10.1039/d0cp02422h), 2021-01-01
Supplement: d0cp02422h1.pdf [file d0cp02422h1.pdf]

There is no supplementary information available for this article.
